# Supplementary material
Source: HighWire-hosted journal article supplement (https://bmjopen.bmj.com/content/8/1/e018880)

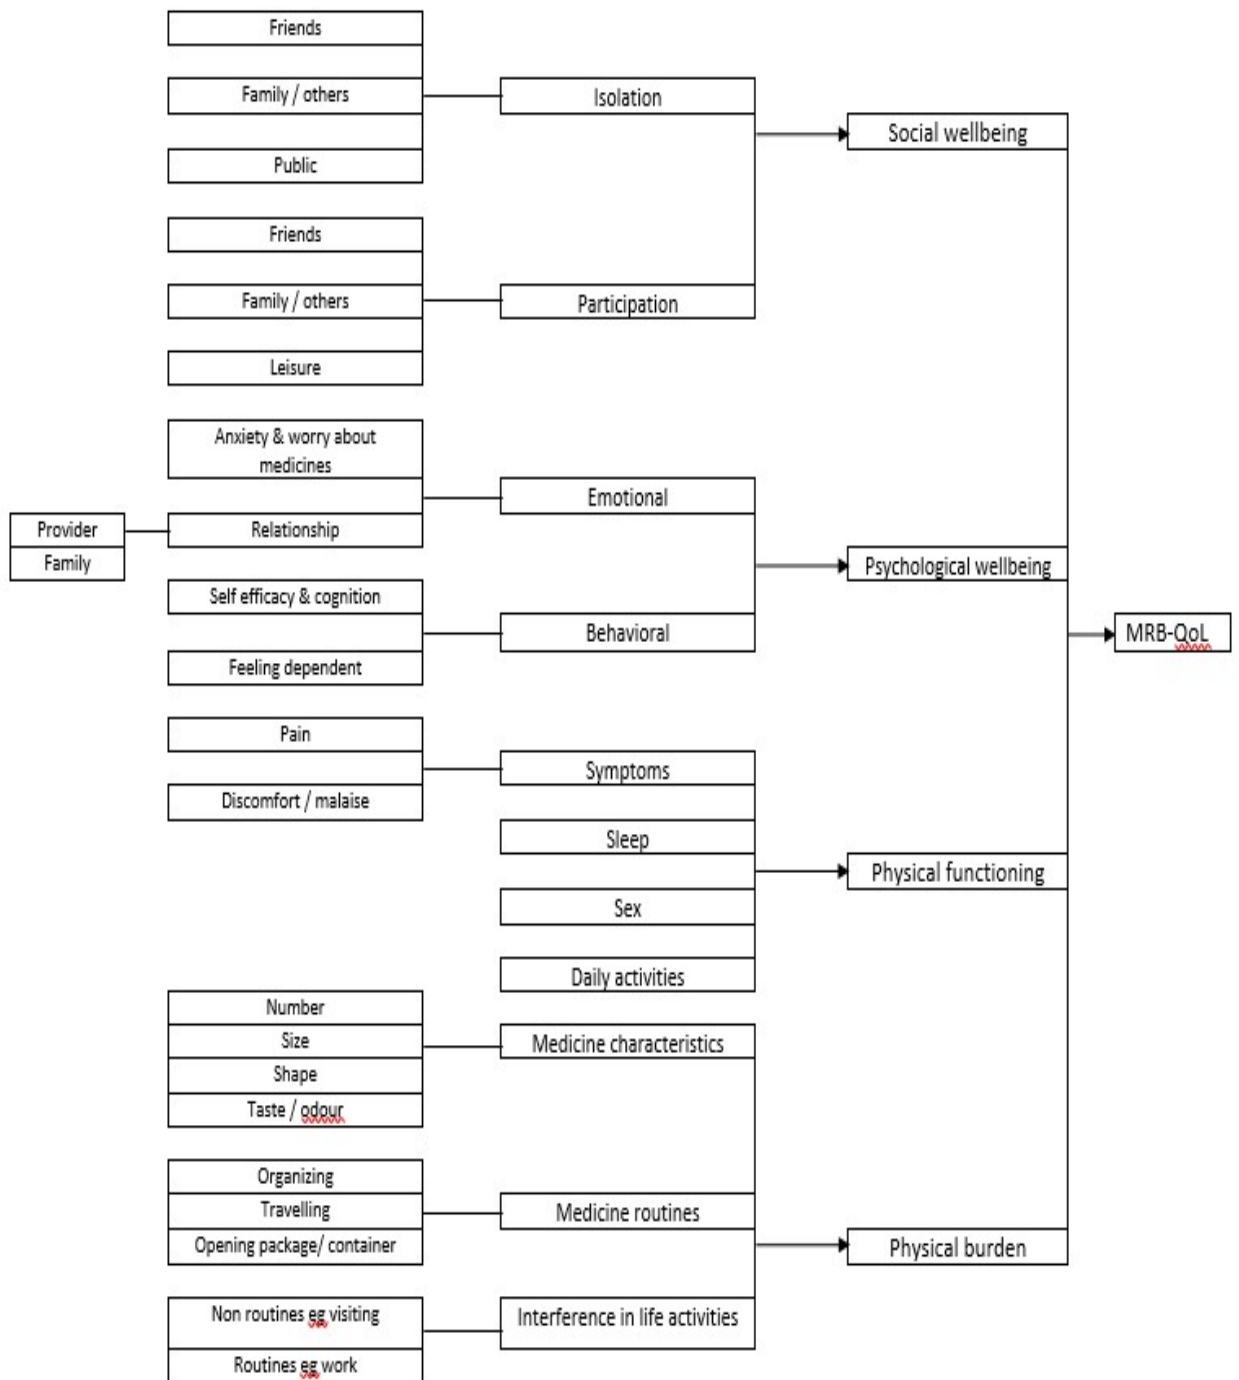

Supplementary file 1: Conceptual model of Medication-Related Burden for Quality of Life (MRB-QoL)

Supplement: inline-supplementary-material-1 [file inline-supplementary-material-1.pdf]
